# Supplementary material
Source: PubMed Central journal article supplement (PMC3634890)
Supplement: NIHMS444862-supplement-Supplemental_Table_1.pdf [file NIHMS444862-supplement-Supplemental_Table_1.pdf]

**Supplemental Table**

Characteristics of the genetic defects and onset of thrombotic episodes in the 15 unrelated Chinese subjects carrying Arg147Trp and Lys150del variants

| patient No. | Age/sex  | Activity (%)              | Antigen (%)               | Nucleotide variation (DNA)                 | Amino acid substitution                     | Thrombotic episodes (onset age) | Thrombophilic factors | Thrombotic episodes (family member)                                                                        |
|-------------|----------|---------------------------|---------------------------|--------------------------------------------|---------------------------------------------|---------------------------------|-----------------------|------------------------------------------------------------------------------------------------------------|
| 1           | 20/M     | 19.0                      | 42.0                      | g.1474G>A<br>g.6152C>T                     | p.Glu29 Lys<br>p.Arg147Trp                  | PE (19)                         |                       | DVT, PVT (father with p.Glu29Lys)                                                                          |
| 2           | 27/M     | 39.0                      | 42.1                      | g.5498C>T<br>g.6152C>T                     | p.Arg15Trp<br>p.Arg147Trp                   | DVT(25), DVT(26)                |                       |                                                                                                            |
| 3           | 24/M     | 46.0<br>19.5 <sup>a</sup> | 64.4<br>20.9 <sup>b</sup> | g.6152C>T<br>c.1680T>A <sup>c</sup>        | p.Arg147Trp<br>P.Tyr519X <sup>d</sup>       | PE (22), DVT(22), DVT (24)      | Protein S deficiency  | DVT (father with p.Tyr519X in PROS)                                                                        |
| 4           | 47/M     | 30.0                      | 48.4                      | g.6152C>T<br>g.6245C>T                     | p.Arg147Trp#<br>p.Arg178Trp#                | DVT (40y), DVT (43)             | Cholecystectomy       | DVT (brother with the double mutations)                                                                    |
| 5           | 24/F     | 38.6                      | 45.3                      | g.6152C>T                                  | p.Arg147Trp                                 | DVT (23), DVT (24)              |                       |                                                                                                            |
| 6           | 68/M     | 46.8                      | 67.2                      | g.6152C>T                                  | p.Arg147Trp                                 | Both DVT and PE (68)            | Cholecystectomy       |                                                                                                            |
| 7           | 24/F     | 65.9                      | 76.5                      | g.6152C>T                                  | p.Arg147Trp                                 | DVT (21)                        |                       |                                                                                                            |
| 8           | 33/F     | 63.9                      | 71.8                      | g.6152C>T                                  | p.Arg147Trp                                 | DVT (33)                        | Puerperium            |                                                                                                            |
| 9           | 19/M     | 69.4                      | 74.9                      | g.6152C>T                                  | p.Arg147Trp                                 | DVT (19)                        |                       |                                                                                                            |
| 10          | 28/M     | 63.9                      | 64                        | g.6152C>T                                  | p.Arg147Trp                                 | DVT (28)                        |                       |                                                                                                            |
| 11          | 32/F     | 1.2                       | 0                         | c.3135C>G<br>c.6128T>G                     | p.Cys64Trp<br>p.Phe139Val                   | DVT (24), MVT (30),<br>DVT(31)  |                       | DVT, MVT and disseminated thrombosis (mother with p.Cys64Trp)                                              |
|             | 6/F*     | 30.5                      | 54.8                      | c.6128T>G<br>c.6161-6163delAAG             | p.Phe139Val<br>p.Lys150del                  |                                 |                       |                                                                                                            |
| 12          | 30/M     | 36.0                      | 57.0                      | c.26T>C<br>c.7212 C>T<br>c.6161-6163delAAG | p.Leu-34Pro#<br>p.Ala209Val#<br>p.Lys150del | DVT (28y), DVT (30)             | Protein S deficiency  | DVT (mother with p.Lys150del combined with protein S deficiency ), MVT (brother with the double mutations) |
|             | proteinS | 18.0 <sup>a</sup>         | 23.7. <sup>b</sup>        |                                            |                                             |                                 |                       |                                                                                                            |

|    |      |      |      |                   |             |                        |
|----|------|------|------|-------------------|-------------|------------------------|
| 13 | 19/M | 50.3 | 61.3 | c.6161-6163delAAG | p.Lys150del | Left CVT (19) DVT (19) |
| 14 | 28/M | 68.7 | 68.2 | c.6161-6163delAAG | p.Lys150del | DVT (27)               |
| 15 | 18/F | 56.0 | 44.0 | c.6161-6163delAAG | p.Lys150del |                        |

PC:A: 70-140%; PC:Ag: 70-130%; FPS:A: 63~135%; FPS: Ag: 60~150%.

a: FPS:A; b: FPS: Ag; c: PS cDNA; d: PS amino acid substitution; #: double mutations: \*daughter of the Patient 11

DVT: deep venous thrombosis (indicating the low extremity here); PE: pulmonary embolism; PVT: portal venous thrombosis; MVT: mesenteric venous thrombosis; AVT: axillary vein thrombosis; ND: not detected

Clinical data were obtained as described by Ding et al in Ref. 16.
